# Supplementary material for: Development of a Novel Simulation Reactor for Chronic Exposure to Atmospheric Particulate Matter
Source: PubMed Central journal article supplement (PMC5294446; doi:10.1038/srep42317), 2017-02-07
Supplement: srep42317-s1.pdf [file srep42317-s1.pdf]

**Supporting information:**

**Development of a Novel Simulation Reactor for Chronic Exposure to Atmospheric Particulate Matter**

Jianhuai Ye<sup>1</sup>, Sepehr Salehi<sup>2</sup>, Michelle L. North<sup>1</sup>, Anjelica M. Portelli<sup>1</sup>, Chung-Wai Chow<sup>1, 2, 3, \*</sup>  
and Arthur W. H. Chan<sup>1, \*</sup>

<sup>1</sup> Department of Chemical Engineering & Applied Chemistry, University of Toronto

<sup>2</sup> Division of Respiriology and Multi-Organ Transplantation Programme, University Health Network, University of Toronto

<sup>3</sup> Dalla Lana School of Public Health, University of Toronto

\*Corresponding emails: [arthurwh.chan@utoronto.ca](mailto:arthurwh.chan@utoronto.ca) or [cw.chow@utoronto.ca](mailto:cw.chow@utoronto.ca)

## Retention Indices of N-SOA Components

The retention index of a chemical compound is defined by normalizing its retention time to the retention times of co-eluting n-alkanes in the same gas chromatogram<sup>1</sup>. In temperature-programmed chromatography, the retention index of a certain compound *i* can be calculated as:

$$I_i = \frac{t_i - t_n}{t_N - t_n} \times 100 + 100 \times n$$

where  $I_i$  is the retention index of compound *i*;  $t_i$ ,  $t_n$ ,  $t_N$  are the retention time of compound *i*, smaller n-alkane and larger n-alkane, respectively; *n* is number of carbons in smaller n-alkane compound.

The references for the retention indices listed in Table 1 are shown as follows:

| Compounds                         | Reference |
|-----------------------------------|-----------|
| Benzoic acid                      | Ref. 2    |
| 1,3-Indandione                    | Ref. 3    |
| Naphthaquinone                    | Ref. 4    |
| 1-naphthalenol and 2-naphthalenol | Ref. 5    |

## References

1. Kováts, E. Gas-chromatographische Charakterisierung organischer Verbindungen. Teil 1: Retentionsindices aliphatischer Halogenide, Alkohole, Aldehyde und Ketone. *Helv. Chim. Acta* **41**, 1915–1932 (1958)
2. Alves, R.J.V., Pinto, A.C., da Costa, A.V.M., Rezende, C.M., *Zizyphus mauritiana* Lam. (Rhamnaceae) and the chemical composition of its floral fecal odor, *J. Braz. Chem. Soc.*, **16**, 654-656 (2005).
3. Rostad, C.E.; Pereira, W.E., Kovats and Lee retention indices determined by gas chromatography/mass spectrometry for organic compounds of environmental interest, *J. Hi. Res. Chromatogr. Chromatogr. Comm.*, **9**, 328-334 (1986).
4. Lopez-Avila, V.; Benedicto, J.; Baldin, E.; Beckert, W.F., Analysis of classes of compound of environmental concern: I. Nitroaromatic compounds, *J. Hi. Res. Chromatogr.*, **14**, 601-607 (1991).
5. Amorim, L.C.A.; Dimandja, J.-M.; Cardeal, Z. de.L., Analysis of hydroxylated polycyclic aromatic hydrocarbons in urine using comprehensive two-dimensional gas chromatography with a flame ionization detector, *J. Chromatogr. A.*, **1216**, 2900-2904 (2009).
